1 **Population structure and evolution of *Salmonella enterica* serotype Typhi in Zimbabwe**  
2 **before a typhoid conjugate vaccine immunization campaign**

3 Gaetan Thilliez<sup>3‡</sup>, Tapfumanei Mashe<sup>1,2,7‡</sup>, Blessmore V. Chaibva<sup>4</sup>, Valerie Robertson<sup>5</sup>, Matt  
4 Bawn<sup>3,11,12</sup>, Andrew Tarupiwa<sup>2</sup>, Faustinos Tatenda Takawira<sup>1,2</sup>, Marleen M. Kock<sup>1,6</sup>, Stanley  
5 Midzi<sup>7</sup>, Lusubilo W. Mwamakamba<sup>8</sup>, Jorge Matheu<sup>9</sup>, Robert A. Kingsley<sup>3,10#</sup>, Marthie M.  
6 Ehlers<sup>1,6#</sup>

7 <sup>1</sup>University of Pretoria, Pretoria, South Africa

8 <sup>2</sup>National Microbiology Reference Laboratory, Harare, Zimbabwe

9 <sup>3</sup>Quadram Institute Bioscience, Norwich, United Kingdom

10 <sup>4</sup>Ministry of Health and Child Care, Harare, Zimbabwe

11 <sup>5</sup>University of Zimbabwe, Harare, Zimbabwe

12 <sup>6</sup>National Health Laboratory Service, Pretoria, South Africa

13 <sup>7</sup>World Health Organization, Harare, Zimbabwe

14 <sup>8</sup>World Health Organization Regional Office for Africa, Brazzaville, Republic of Congo

15 <sup>9</sup>World Health Organization, Geneva, Switzerland

16 <sup>10</sup>University of East Anglia, Norwich, United Kingdom

17 <sup>11</sup>Earlham Institute, Norwich, United Kingdom

18 <sup>12</sup>Current address: University of Leeds, Leeds, United Kingdom

19

20 ‡ These first authors contributed equally to this article.

21 # These senior authors contributed equally to this article.

22 Correspondence to Tapfumanei Mashe [mashet2006@yahoo.co.uk](mailto:mashet2006@yahoo.co.uk) or Robert A. Kingsley  
23 [Rob.Kingsley@quadram.ac.uk](mailto:Rob.Kingsley@quadram.ac.uk)

24

25 **Key words:** *S. Typhi*, AMR, vaccination, typhoid conjugate vaccine, Zimbabwe

26

27

## Abstract

28

29 **Background:** The continued emergence of *Salmonella enterica* serovar Typhi (*S. Typhi*)  
30 with ever increasing antimicrobial resistance (AMR), necessitates the use of vaccines in  
31 endemic countries. A typhoid fever outbreak in Harare, Zimbabwe in 2018 from a multidrug  
32 resistant *S. Typhi* with additional resistance to ciprofloxacin was the catalyst for the  
33 introduction of a typhoid conjugate vaccine program. To investigate the historic emergence  
34 and evolution of AMR of endemic *S. Typhi* in Zimbabwe and determined the population  
35 structure, gene flux and sequence polymorphisms of strains isolated prior to mass typhoid  
36 vaccination to provide a baseline for future evaluation of the effect of the vaccination  
37 program.

38 **Methods:** We determined the population structure, gene flux and sequence polymorphisms  
39 and reconstructed the evolution of AMR. The *S. Typhi* population structure was investigated  
40 in the context the genome sequence of 1904 strains isolated from 65 countries to reconstruct  
41 spread of endemic strains into Zimbabwe.

42 **Findings:** The population structure of *S. Typhi* in Zimbabwe is dominated by multidrug  
43 resistant genotype 4.3.1.1 (H58) that spread to Zimbabwe from neighboring countries around  
44 2009. Evolution of AMR within Zimbabwe included acquisition of an IncN plasmid carrying  
45 a *qnrS* gene and a mutation in the quinolone resistance determining region of *gyrA* gene, both  
46 implicated in resistance to quinolone antibiotics. A minority population of antimicrobial  
47 susceptible *S. Typhi* genotype 3.3.1 strains was detected in typhoid cases.

48 **Interpretation:** The currently dominant *S. Typhi* population is genotype 4.3.1.1 that spread  
49 to Zimbabwe and acquired additional AMR through acquisition of a plasmid and mutation of  
50 the *gyrA* gene. This study provides a baseline for future evaluation of the impact of the  
51 Typhoid Conjugate Vaccine program in Harare.

52

53 **Funding:** RAK and GT were supported by Bill and Melinda Gates Foundation project  
54 OPP1217121 and the BBSRC Institute Strategic Programme BB/R012504/1 and its  
55 constituent project BBS/E/F/000PR10348.

56

57

58

59

60

61

62

## Introduction

63

64 Typhoid fever is a systemic disease caused by *Salmonella enterica* serotype Typhi (*S. Typhi*)  
65 that remains an important cause of morbidity and mortality in low-resource settings (1, 2).  
66 The current global burden of disease is estimated at 11 to 18 million infections resulting in  
67 135 900 deaths annually, with the majority recorded in South Asia and Africa (3-5). Prior to  
68 the use of antimicrobial therapy for management of typhoid fever, case fatality rates exceeded  
69 20% due to complications such as intestinal perforation (6). Timely access to effective  
70 antimicrobial therapy is central to preventing complications such as intestinal perforation and  
71 death (7). Fluoroquinolones are generally used in resource-limited countries as the primary  
72 therapy for typhoid for decades (6). Recent emergence of fluoroquinolone and cephalosporin  
73 resistant strains of *S. Typhi* has resulted in an increased reliance on azithromycin and  
74 carbapenems which are expensive and often inaccessible in resource-limited settings where  
75 typhoid is most common (6, 8). The emergence and escalating antimicrobial resistance  
76 throughout the world have focused increasing attention on the use of typhoid vaccines (6, 8,  
77 9).

78

79 Multiple outbreaks of typhoid fever have been reported in Zimbabwe since 2009, with most  
80 beginning during the rainy season (10, 11). A typhoid outbreak caused by a ciprofloxacin-  
81 resistant strain of *S. Typhi* was detected in Harare, Zimbabwe, in September 2018 (12).  
82 Analysis of a small number of strains of *S. Typhi* isolated from typhoid fever cases between  
83 2012 and 2019 revealed that most isolates during this period were H58 encoding resistance to  
84 aminoglycoside,  $\beta$ -lactam, phenicol, sulphonamide, tetracycline and fluoroquinolone  
85 antibiotics (13). In response, an emergency reactive vaccination campaign using Typhoid  
86 Conjugate Vaccine (TCV) was implemented from February to March 2019, targeting more  
87 than 323 000 persons who were at high risk for typhoid infection in Harare. Initial reports  
88 suggested that the vaccine provided moderate protection against typhoid fever, with an  
89 adjusted vaccine effectiveness of up to 67% (11). Further epidemiological investigation of the  
90 effect of the vaccine program on *S. Typhi* incidence and population structure of the pathogen  
91 are needed to fully evaluate the outcome (14). The aim of this study was to investigate the  
92 population structure of *S. Typhi* isolates from urban areas of Harare to establish the history of

93 spread of the current endemic clones in the context of the global *S. Typhi* population and the  
94 understand the molecular basis and evolution of antimicrobial resistance in Zimbabwe. We  
95 focused on the population structure of *S. Typhi* prior to the TCV vaccination program to  
96 provide a baseline for future evaluation of potential effects of the program on endemic *S.*  
97 *Typhi* in Harare.

98

99

## Methods

100

101 **Bacterial strains and data sources.** Epidemiological data was obtained from the Harare city  
102 department health reports and clinical records. The extracted information included details  
103 regarding demographic indicators, age, sex, suburb and clinical presentation of the disease.  
104 Ethics approval for the study was granted by the University of Pretoria, South Africa  
105 (779/2018) and Medical Research Council of Zimbabwe (MRCZ/A/2369). A total of 95 *S.*  
106 *Typhi* isolates from Zimbabwe were investigated in the context of 1,904 isolates collected  
107 between 1905 and 2019 and originated from 65 countries spanning six continents in this  
108 study (Asia, Africa, North and South America, Europe, and Australia and Oceania) (Table  
109 S1). Of the 95 isolates 38 *S. Typhi* from Zimbabwe were previously sequenced by Mashe *et*  
110 *al.* (12) and Ingle *et al.* (15) while 57 were sequenced for this study. This isolate set is a  
111 convenience sample of strains from Zimbabwe from stool or blood. *S. Typhi* strains were  
112 identified using biochemical and slide agglutination as described previously (16, 17).  
113 Susceptibility of 68 *S. Typhi* (2018) was determined using disc diffusion tests (Kirby-Bauer)  
114 (18) with concentrations of antibiotics as follows: ampicillin (10 µg), chloramphenicol (30  
115 µg), trimethoprim/sulfamethoxazole (1.25/23.75 µg), ceftriaxone (30 µg), azithromycin (15  
116 µg), ciprofloxacin (5 µg) and tetracycline (30 µg) (Mast, Hampshire, UK) (18). Zone  
117 diameters were measured and interpreted using CLSI guidelines (19). Accession number and  
118 associated metadata are provided in Supplementary Table 1.

119

120 **Whole-genome sequencing and quality control.** Isolates were cultured on MacConkey agar  
121 for 18–20 hours at 37°C. A single colony was used to inoculate LB Broth and genomic DNA  
122 extracted from 1 mL using a Promega Wizard kit according to the manufacturer's instructions  
123 (Promega, USA). DNA was quantified using the Qubit 3 and Nanodrop (ThermoFisher, UK).  
124 Library preparation of genomic DNA was done using the LITE pipeline as described  
125 previously (20) and sequencing was performed using Nextseq (Illumina) with a Mid Output

126 Flowcell (NSQ® 500 Mid Output KT v2). Read quality was assessed with fastp (21) and  
127 summarized with multiqc (22). Bracken (23) was used to assess the level of contamination.  
128 Sequences with a theoretical read depth below 20x, or with less than 80% of *Salmonella*  
129 reads were excluded from further analysis.

130

131 **Phylogenetic reconstruction.** Maximum-likelihood phylogenetic trees were constructed  
132 from the core single-nucleotide polymorphism (SNP) alignment with reference to *S* Typhi  
133 strain CT18 (24) using snippy version 4.3.6 as previously described (25). The root node of  
134 trees was identified by including outgroups that were removed from final version of the tree  
135 (Supplementary table 2). RAxML (version 8.2.10) (26) was used to construct maximum  
136 likelihood phylogenetic trees from the core alignment, with the generalized time-reversible  
137 model and a Gamma distribution (GTR+ $\Gamma$  substitution GTRGAMMA in RAxML) to model  
138 site-specific rate variation. Support for the maximum-likelihood phylogeny was assessed with  
139 rapid bootstraps based on the MRE\_IGN Bootstrapping criterion. For time-scaled  
140 phylogenetic trees, the 4.3.1.1EA1 subtree was extracted using the tree\_subset function from  
141 treeio (27) and dating of nodes was performed using bactDating (28) using the root from the  
142 subtree. Strict gamma, relaxed gamma, mixed gamma, arc, carc and mixedcarc clock models  
143 were tested and compared using the BactDating modelcompare function. The arc model was  
144 used for the analysis as it showed the lowest deviance information criterion (DIC) (28).

145

146 **Identification of sequence polymorphisms, pangenome analysis and annotation.**  
147 Antimicrobial resistance genes and plasmid replicons were identified using ARIBA version  
148 2.14.6 (29) with the Plasmidfinder (version 1.2) (30) and ResFinder (version 3.1) (31)  
149 databases. Mutations in the *gyrA*, *gyrB* and *parC* chromosomal genes were detected using  
150 resistance gene identifier (RGI; version 5.1.1) (29). Genome assembly was carried out using  
151 SPAdes version 3.13.0 (32) with default parameters. The quality of the assembly was  
152 assessed with the quality assessment tool for genome assemblies QUILT version 5.0.2 (33).  
153 Assemblies larger than 5.5 MB were excluded from further analysis. Gene models and  
154 annotation was carried out using Prokka version 1.14.5 and Bandage (34, 35). For  
155 determination of pangenome and accessory genome, assembled and annotated genome  
156 sequences were used as input for Roary version 3.11.2 (36) to identify gene families and their  
157 distribution within *S. Typhi* isolates from Zimbabwe. The gene presence absence matrix was  
158 filtered to focus on genes present in at least 3 isolates (~3%) and at most 90 isolates (~95%).

159 Regions of interest were extracted from the relevant genomes for further analysis. Prophage  
160 annotation was done using a combination of Prokka to generate the gene model and by  
161 manual curation using the output from BLASTp derived annotation of the ORF against nr  
162 database (37). Nucleotide sequence BLAST results of prophage ZIM331 against the P88  
163 reference (NC\_026014) was visualized using genoPlotR (38).

164

165

## Results

166

167 **Two genotypes were circulating in Zimbabwe in 2018 with ongoing evolution of AMR in**  
168 **the dominant 4.3.1 (H58) genotype.** Typhoid fever is a reportable disease in Zimbabwe with  
169 many of the cases in high density populations of urban Harare situated in north-eastern  
170 Zimbabwe (Figure 1A). To establish a convenience sample of *S. Typhi* strains prior to TCV  
171 vaccination, all available data regarding typhoid in Harare city health reporting systems  
172 between January 2018 and December 2018 were reviewed. In total, 3,946 suspected typhoid  
173 fever cases were reported in Zimbabwe (Figure 1B). An increase in suspected cases were  
174 reported from the first week of 2018 that peaked in the fourth week followed by a gradual  
175 decline from week 10 to week 18 (Figure 1C). An increase in overall daily cases was  
176 observed from week 45 to week 52 (Figure 1C). Of the 3,946 suspected typhoid fever cases  
177 128 were confirmed by culture tests and 57 were randomly selected for whole genome  
178 sequencing and analysis.

179

180 To investigate the phylogenetic relationship of *S. Typhi* isolated from clinical cases of  
181 typhoid fever in Zimbabwe, the whole genome sequence from a total of 95 isolates from  
182 typhoid fever infections in Zimbabwe between 2012 and 2019 were analyzed. These included  
183 85 from infections in Zimbabwe (12) and 10 from clinical infections in the UK that were  
184 associated with travel to Zimbabwe (15). A maximum likelihood phylogenetic tree based on  
185 variation in the core genome sequence revealed a population structure for *S. Typhi* isolated  
186 from Zimbabwe consisting of two subclades corresponding to genotypes 4.3.1 (H58) (88/95,  
187 93%) and 3.3.1 (7/95, 7%) (Figure 2). The *S. Typhi* isolates from the 2018 outbreak were  
188 present throughout the tree including genotypes of both 4.3.1.1 and 3.3.1 and were closely  
189 related to isolates from previous years and five isolates from 2019 (Figure 2). *Salmonella*  
190 *Typhi* isolates of genotype 4.3.1.1 (H58) encoded between six and ten AMR genes, while  
191 resistance genes were not detected in any isolates of genotype 3.3.1.

192

193 All isolates of 4.3.1.1 (H58) had *aph-6*, *bla*<sub>TEM-1B</sub>, *dfrA7.1*, *catA1*, *sul1* and *sul2* genes  
194 conferring resistance to aminoglycosides, penicillin and older cephalosporins, trimethoprim,  
195 phenicols, and sulphonamides, respectively (Figure 2). A total of 62 isolates had three  
196 additional AMR genes, *tetA*, *dfrA14* and *qnrS*, whose presence coincided with the detection  
197 of sequence from an IncN plasmid (subtype PST3). Most strains (60/62) with *tetA*, *dfrA14*  
198 and *qnrS* genes were present in a single distal sub-clade within the Zimbabwe 4.3.1.1  
199 population structure (blue sub-clade in Figure 2), with two isolates with this AMR profile  
200 situated in a more-basal rooted clade. All of the isolates with the *tetA*, *dfrA14* and *qnrS* genes  
201 were isolated from 2016 to 2019. The *aph3lb* gene has a complex distribution within the  
202 4.3.1.1 (H58) population in Zimbabwe consistent with multiple acquisitions or losses. While  
203 the *aph3lb* was present in all but one isolate in the basal-rooted clade, it was sporadically  
204 distributed within the distal clade containing the IncN plasmid. A total of 18 isolates (20%)  
205 contained a mutation in the *gyrA* gene predicted to result in a S83F substitution in GyrA,  
206 known to result in increased minimum inhibitory concentration for fluoroquinolone antibiotics  
207 (39). GyrA S83F was present in two clusters of thirteen and two isolates within the distal  
208 clade containing the IncN plasmid, and three isolates from the basally rooted clade, all of  
209 which except two also had the *qnrS* gene.

210

211 **Analysis of the accessory genome of Zimbabwe endemic *S. Typhi* indicates clade specific**  
212 **clusters of genes.** To investigate the clade-specific gene content of *S. Typhi* circulating in  
213 Zimbabwe we determined the pangenome of 97 isolates by comparing all predicted protein  
214 sequences using Roary software. Three large clusters of genes co-occurred at a similar  
215 frequency and phylogenetic distribution in either all genotype 4.3.1.1EA1 strains, a subset of  
216 4.3.1.1EA1 or only 3.3.1, and were designated groups 1, 2 and 3, respectively (Figure 3).  
217 Group 1 contained genes present within a transposon containing the *aph-6*, *bla*<sub>TEM-1B</sub>, *dfrA7.1*  
218 and *catA1* resistance genes, described previously (40, 41). Group 2 contained genes  
219 consistent with a plasmid including the IncN replicon and the *tetA*, *dfrA14* and *qnrS* genes.  
220 Alignment of the nucleotide sequence of group 3 genes to sequences in the NCBI database  
221 using BLAST identified multiple prophage genes (Figure 4). A putative prophage that we  
222 designated ZIM331 was most closely related to prophage P88 and consisted of 47 predicted  
223 coding sequences of which 36 had similarity to genes with functions associated with  
224 prophage functions and seven genes encoding hypothetical proteins of unknown function. A



225 cluster of four genes were putative cargo genes and exhibited sequence similarity to  
226 *hxsDBCA*, a super-family of genes that encode proteins with diverse activity in metabolic  
227 processes (42).

228

229 **The 4.3.1.1 clone emerged in Zimbabwe around 2009 and acquired additional AMR**  
230 **genes on an IncN plasmid around 2012.** To investigate the phylogenetic relationship of 95  
231 *S. Typhi* isolates from Zimbabwe in the context of the global *S. Typhi* population structure  
232 we constructed a maximum likelihood tree including 1,904 *S. Typhi* isolates from 65  
233 countries, described previously (43, 44) (Figure 5). A cluster of seven genotype 3.3.1 were  
234 closely related to other isolates from East and Southern African countries (Supplemental  
235 figure 1). The majority of the isolates belonged to clade 4 and in particular subclade 4.3 that  
236 include H58 (Figure 5). To further resolve the phylogenetic structure of isolates in clade 4.3  
237 Zimbabwe and the global collection, a phylogenetic tree was constructed based on variation  
238 in the core genome sequence of clade 4.3 only (Figure 6). Genotype 4.3.1.1 isolates from  
239 Zimbabwe were present on a distal lineage within a subclade formed by isolates from East  
240 Africa and Southern Africa. The ladder topology of this part of the phylogenetic tree was  
241 consistent with multiple transmission events in a southerly direction from Kenya to  
242 Tanzania, Malawi and into Zimbabwe, followed by local spread.

243

244 To estimate the time of key spread and evolutionary events associated with AMR in the  
245 emergence of the 4.3.1.1 Zimbabwe endemic clone, a subtree containing genomes from the  
246 4.3.1.1EA1 subclade was extracted from the genotype 4.3 clade maximum likelihood tree.  
247 Linear regression analysis indicated a strong temporal signal for the accumulation of SNPs in  
248 the 4.3.1.1EA1 subtree that was absent if date of isolation was randomly assigned to taxa.  
249 (Supplemental Figure 2). A time-scaled tree constructed by Bayesian inference using  
250 BactDating (28) indicated that the common ancestor of the 4.3.1.1EA1 clade existed around  
251 1987.236 [95% confidence interval 1977.5 - 1994.0] (Figure 7). Most of the deeply rooted  
252 isolates, that were from Kenya, had IncH1 replicon genes that correlated with the presence of  
253 *aph6ld*, *bla<sub>TEM</sub>*, *sul2*, *aph3lb*, *sul1*, *catA1*, *dfrA7.1* and *tetB* AMR genes. Isolates from  
254 Tanzania, Malawi, South Africa and Zimbabwe lacked the IncH1 replicon genes but most  
255 had *aph6ld*, *bla<sub>TEM</sub>*, *sul1*, *sul2*, *aph3lb*, *catA1*, *dfrA7.1* but not *tetB*. Fourteen of 20 isolates  
256 from Tanzania had IncFIB replicon genes and had lost *sul1*, *catA1*, *dfrA7.1* and *tetB*, but  
257 gained a *dfrA14.4* gene. This was consistent with acquisition of the IncH11 plasmid in Kenya



258 followed by sporadic losses. Most isolates from Malawi, South Africa and Zimbabwe had the  
259 *aph6ld*, *bla*<sub>TEM</sub>, *sul2*, *aph3lb*, *sul1*, *catA1*, *dfrA7.1* and *tetB* AMR genes, despite lacking the  
260 IncHII replicon genes that coincided in isolates from Kenya. The exception was the sporadic  
261 apparent loss of the *aph3lb* gene from 30 of the 95 isolates from Zimbabwe, an event not  
262 observed in isolates from Kenya, Tanzania, Malawi or South Africa.

263 The common ancestor of all *S. Typhi* 4.3.1.1EA1 isolates from Zimbabwe was estimated to  
264 have existed around 2009 [95% confidence interval: 2008.5 – 2010.0], consistent with  
265 epidemiological records indicating increased outbreaks of typhoid fever from this time (11,  
266 13). Additional evolution of AMR was also exclusively observed in isolates from Zimbabwe  
267 with the apparent acquisition of *dfrA14*, *qnrS* and *tetA* AMR genes whose presence coincided  
268 with the presence of IncN replicon genes. The common ancestor of the IncN-containing  
269 isolates was around 2012 [95% confidence interval: 2011.5 – 2013.3]. Isolates with a *gyrA*  
270 mutation resulting in the S83F substitution associated with fluoroquinolone resistance shared  
271 a common ancestor or were isolated since around 2015.

272

273

## Discussion

274

275 Recurrent outbreaks of typhoid fever have been recorded in Zimbabwe since 2009 (13, 45).  
276 We found that during the period 2012 to 2019 strains of genotype 4.3.1.1, also known as  
277 H58, and genotype 3.3.1 were endemic. Both were likely to have been endemic during this  
278 time since they each formed clusters of closely related strains, 3.3.1 between 2014 and 2018  
279 and genotype 4.3.1.1 throughout (13). The absence of 3.3.1 in 2012 and 2019 was likely due  
280 to the relatively small number of isolates investigated in these years. The vast majority of *S.*  
281 *Typhi* isolates from Zimbabwe in this study (88/95) were of the globally distributed genotype  
282 4.3.1.1 that is characterized by multidrug resistance encoded on a transposon on an IncHII  
283 plasmid or incorporated into the chromosome (46). In contrast, we found that isolates of  
284 genotype 3.3.1 lacked AMR genes entirely.

285

286 All the *S. Typhi* genotype 4.3.1.1 isolates from Zimbabwe formed a discrete cluster within a  
287 subclade designated genotype 4.3.1.1EA1, composed entirely of isolates from east and  
288 southern African, or travel to this region (47). 4.3.1.1EA1 was in turn rooted within isolates

289 from Southern Asia consistent with initial introduction from Southern Asia into Kenya and  
290 Tanzania and subsequent spread south into Malawi, as reported previously (44, 48). Our  
291 analyses confirm further transmission of this clone to Zimbabwe. The strong association of  
292 isolates from each country into distinct subclades within the genotype 4.3.1.1EA1 population  
293 structure suggests that spread resulted from a single transmission event into each country  
294 followed by local transmission of a clone. Multiple transmission events would be expected to  
295 result in a greater degree of mixing of isolates from each country in the phylogenetic tree,  
296 although additional analysis of more recent isolates from Kenya, Tanzania and Malawi may  
297 reveal other transmission. The common ancestor of all Zimbabwe isolates was around 2009  
298 marking the earliest date for introduction of genotype 4.3.1.1EA1 into Zimbabwe. This  
299 coincides with reports of renewed outbreaks in Zimbabwe from this time for unknown  
300 reasons (45), but may be due to the arrival of this new genotype.

301

302 To date, genotype 3.3.1 isolates have garnered little attention compared to 4.3.1.1 as they are  
303 relatively rare and susceptible to antibiotics and consequently their global spread remains to  
304 be determined. A total of 34 isolates of genotype 3.3.1 were present in the global strain  
305 collection of 1904 whole genome sequences used in this study, while only 60 were available  
306 on TyphiNET out of 5,327 genomes (accessed August 2022) (49), suggesting that this  
307 genotype remains relatively rare globally, or under sampled. Nonetheless, the 34 genotype  
308 3.3.1 isolates were from 10 different countries, with over 90% from East and Southern  
309 African (n=21) and Asian countries (n=10). Notably, in common with genotype 4.3.1.1EA1  
310 isolates, genotype 3.3.1 isolates largely clustered based on the continent and the country of  
311 origin, consistent with international spread and subsequent domestic transmission of local  
312 clones. In contrast to genotype 4.3.1.1EA1, the topology of genotype 3.3.1 phylogeny  
313 consisted of country-specific clades with deeply rooted branches consistent with rapid initial  
314 spread globally and little current evidence of spread since. Additional genomes sequences are  
315 needed to investigate the time and phylogeographic spread in detail.

316

317 The evolution of *S. Typhi* strains with ever greater resistance to antimicrobials through  
318 acquisition of AMR genes or mutations in drug targets or efflux pumps is continuously  
319 reducing the options for therapy (46, 50). Our analysis of the evolution of the 4.3.1.1EA1  
320 clade highlighted a concerning trend of increased resistance in Zimbabwe. Deeply rooted  
321 4.3.1.1EA1 clades containing strains isolated before 2010 in Kenya were multidrug resistant

322 due to AMR genes on an IncHI1 plasmid typical of genotype 4.3.1.1 isolates from South Asia  
323 (44). As 4.3.1.1EA1 spread south through Tanzania, isolates appear to have lost the IncHI1  
324 plasmid but retained the AMR genes, likely due to their incorporation into the chromosome  
325 as previously described (44). The ancestral strain that spread to Zimbabwe around 2009 was  
326 of this genotype, but within 3 years an ancestor to nearly two thirds of isolates in the present  
327 study, had gained an IncN plasmid containing additional genes including the *qnrS* gene  
328 conferring resistance to quinolone antibiotics. The IncN plasmid is predicted to contain  
329 around 50 genes and it is possible that the energy cost of maintaining this plasmid may only  
330 have been favorable following the loss of the IncHI1 plasmid that contained up to 225 genes  
331 (51), but this remains to be investigated. Fluoroquinolone resistance in *S. Typhi* is normally  
332 associated with mutations in the quinolone resistance determining region (QRDR) of GyrA  
333 and ParC. A previous study reported that QRDR mutations emerged independently on at least  
334 94 occasions globally but almost exclusively in South Asia (48). We detected at least four  
335 independent acquisitions of QRDR mutations in the *gyrA* gene. Notably, two of the mutation  
336 events that accounted for 15 of 18 isolates also contained the *qnrS* gene on the IncN plasmid,  
337 suggesting that accumulation additional QRDR mutations may further increase  
338 fluoroquinolone.

339

340 In response to the 2018 ciprofloxacin-resistant typhoid outbreak, Zimbabwe carried out a  
341 mass typhoid vaccination campaign from February to March 2019 in nine suburbs of Harare  
342 with TCV. Over 318,000 doses were administered targeting children aged between 6 months  
343 and 15 years in affected communities. Previously, whole genome sequencing was  
344 retrospectively used to investigate the effect on the *S. Typhi* population in Thailand following  
345 a national immunization program in 1977 in response to a large outbreak (52). *S. Typhi*  
346 isolates from after the immunization program were found to be travel associated cases from  
347 neighboring countries. Our study provides a detailed insight into the emergence and baseline  
348 population structure of *S. Typhi* in Zimbabwe prior to the recent immunization program to  
349 enable assessment of the impact this program on the population structure of *S. Typhi* in the  
350 future.

351

352

### Author Contributions

353

354 GT, TM, RAK, MME designed the study. TM, BVC, VR, AT, TT, MMK, SM, LWM, JM  
355 acquired data. GT, TM, MB carried out analysis. GT, TM, RAK, MME interpreted the  
356 analysis. GT, TM, RAK drafted the manuscript. All authors critically reviewed the  
357 manuscript and approved the final version of the manuscript.

358

359

#### **Declaration of Interests**

360

361 The authors declare no conflicts of interests arising from financial or personal relationships  
362 with other people or organizations.

363

364

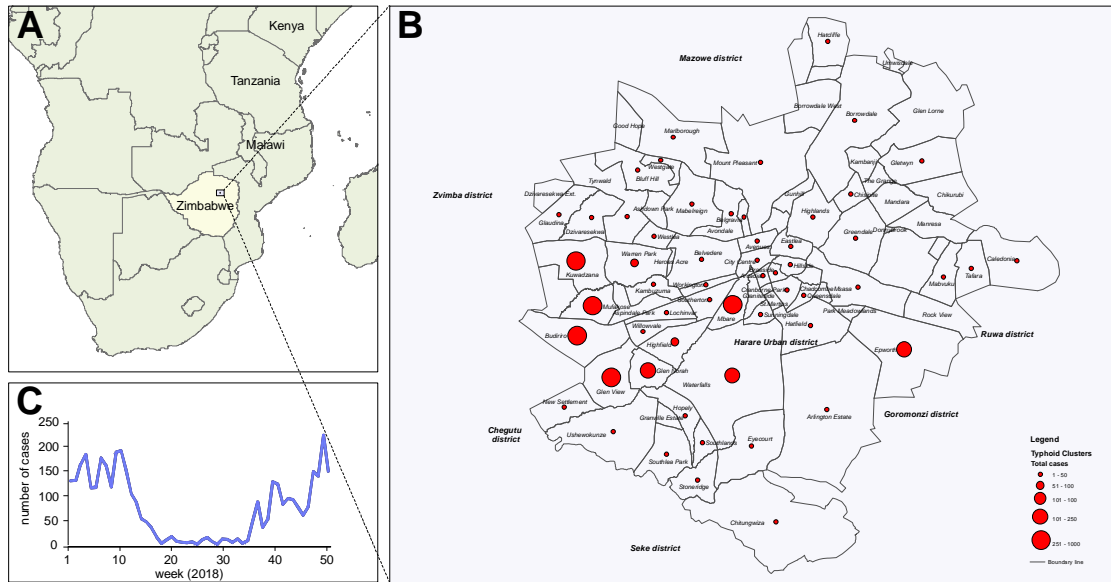

365

366

367 **Figure 1. Epidemiology of typhoid fever in Harare, Zimbabwe in 2018.** (A) Map of  
368 southern Africa showing the location of Zimbabwe and Harare. (B) Geographic distribution  
369 of suspected and confirmed cases of typhoid fever in Harare in 2018. Suburbs are indicated  
370 and the number of cases indicated (red circles) as indicated in the key (inset) (C) Daily  
371 number of suspected and confirmed typhoid cases (seven-day average) during the year 2018.  
372  
373

---

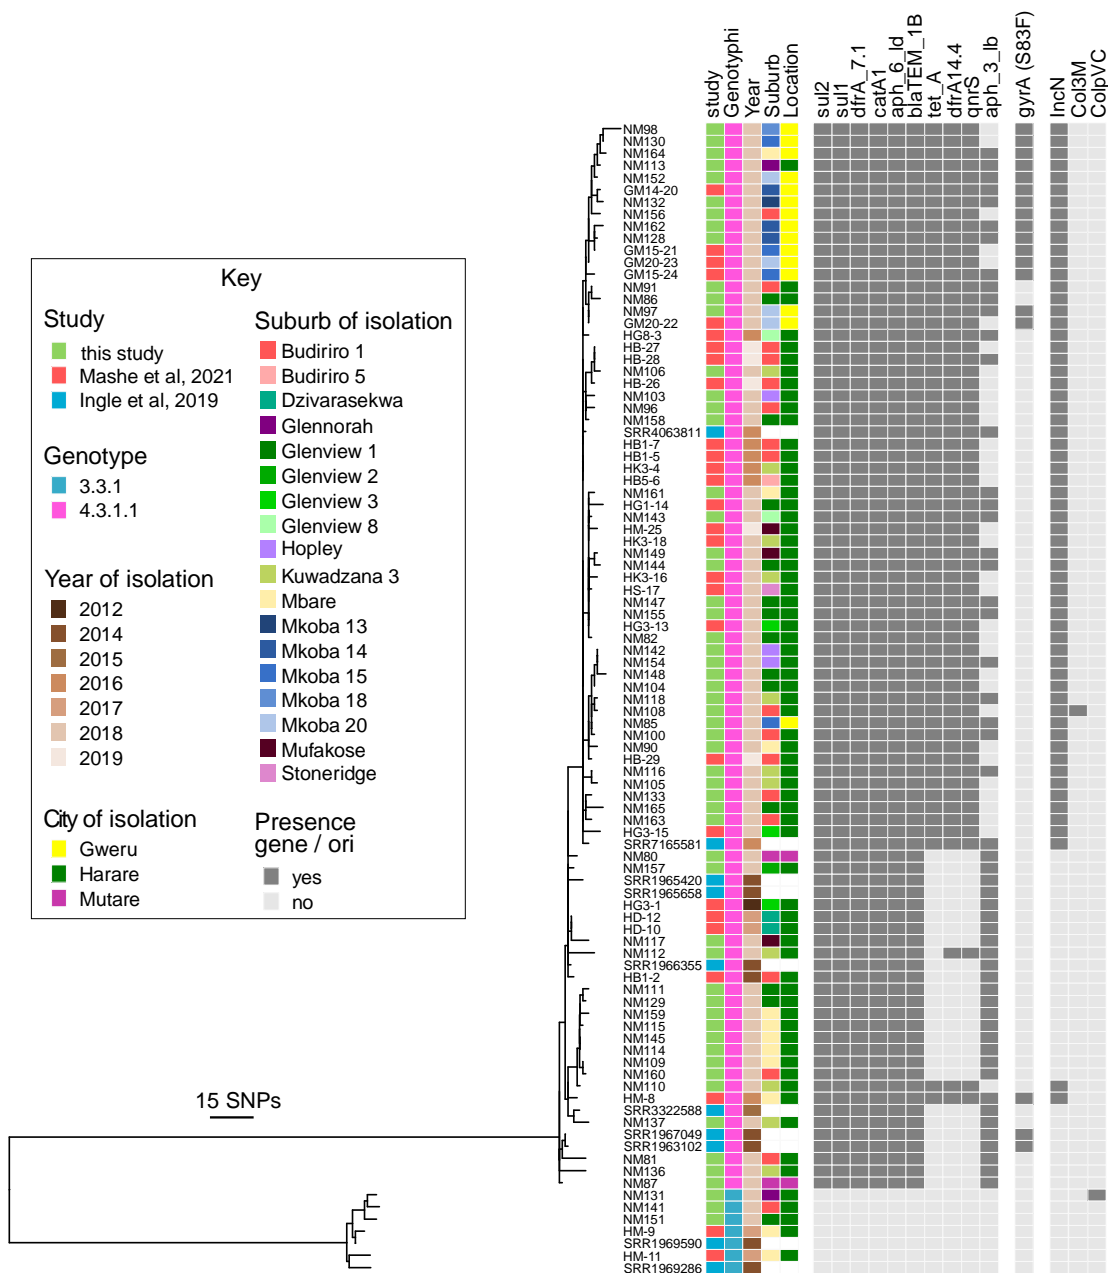

374

375 **Figure 2. Phylogenetic relationship and genomic characteristics of 95 *S. Typhi* strains**  
 376 **isolated from Harare and Gweru from 2012 to 2019.** A maximum likelihood phylogenetic  
 377 tree constructed using nucleotide sequence variation in the shared genome of 95 *S. Typhi*  
 378 strains with reference to *S. Typhi* CT18 whole genome sequence assembly (24) and rooted to  
 379 the reference as an outgroup. Source of the sequence data (study), the genotype (genotype),  
 380 year of isolation (year), and the city (location) and city suburb (suburb) are indicated by  
 381 colors indicated in the key (inset). The approximate number of SNPs are indicated (bar).

382

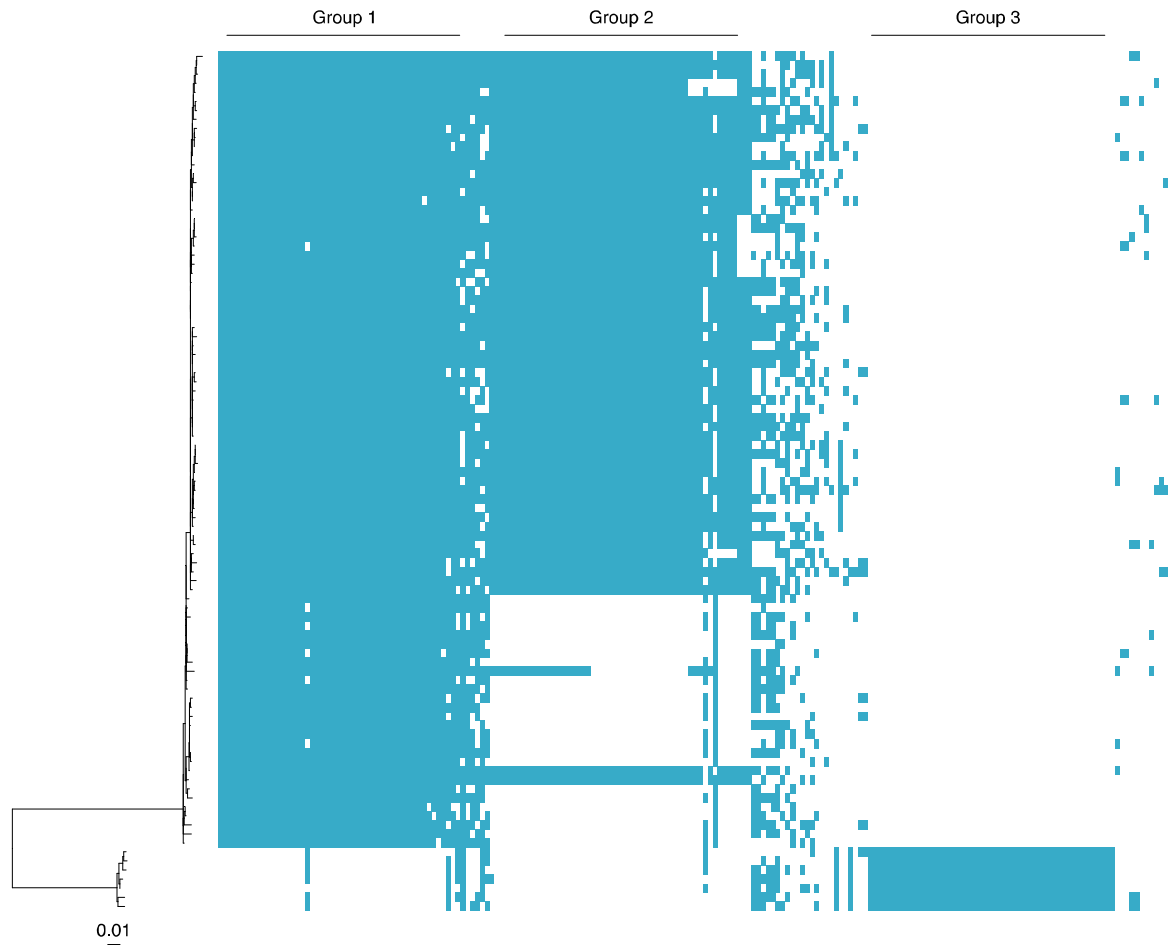

383

384

385 **Figure 3. Accessory genome of 95 *S. Typhi* isolates from typhoid fever cases linked to**  
386 **Zimbabwe.** Gene families (columns) present in each genome (blue) are arranged by  
387 frequency at which they occur in 95 genomes of *S. Typhi* strains isolated in Zimbabwe  
388 (n=85) or in the UK and associated with travel to Zimbabwe (n=10). Only genes present in  
389 greater than two isolates (~3%) and less than 91 isolates (~95%) are shown. Genes with a  
390 similar frequency and phylogenetic distribution were classified as group 1, 2 and 3 that  
391 correlate with genes present on a composite transposon, IncN plasmid and prophage element,  
392 respectively.

393

394



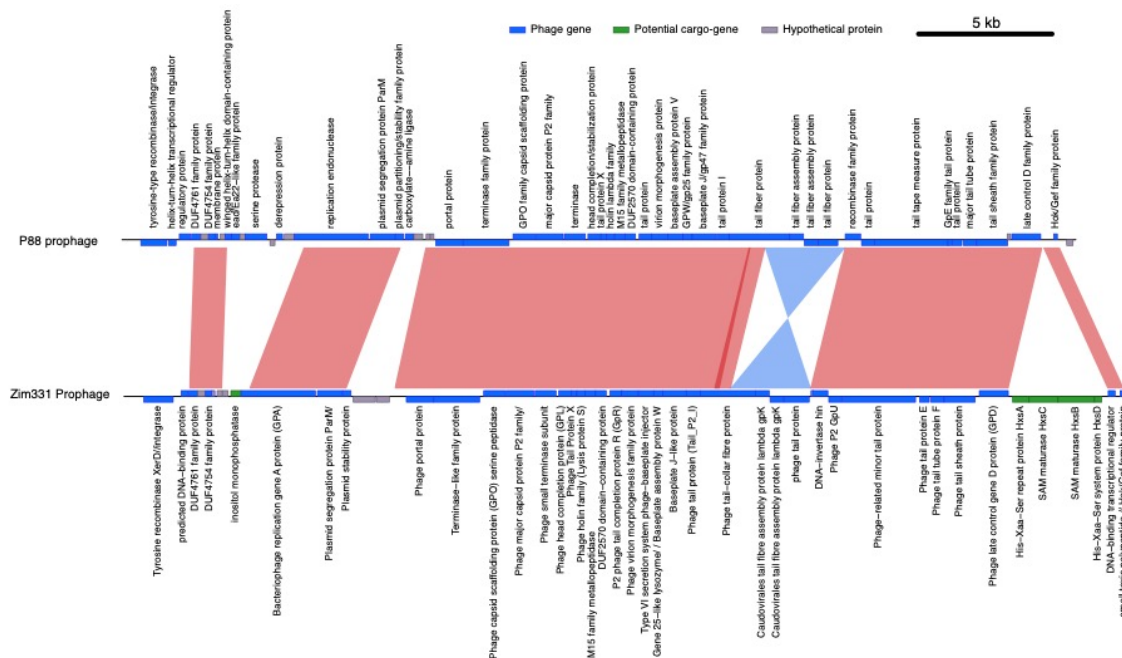

395

396 **Figure 4. Comparison of prophage Zim331 with prophage P88.** A gene model predicted  
 397 using prokka show genes with predicted phage functions (blue bars), potential cargo genes  
 398 (green bars) and hypothetical proteins with no known function (grey bars) based on sequence  
 399 alignment in the NCBI database, are indicated for prophage P88 and prophage Zim331.  
 400 Predicted function for proteins encoded by genes are indicated and regions exhibiting >90%  
 401 sequence identity in direct alignment (red) or reverse and complement alignment (blue) are  
 402 indicated.

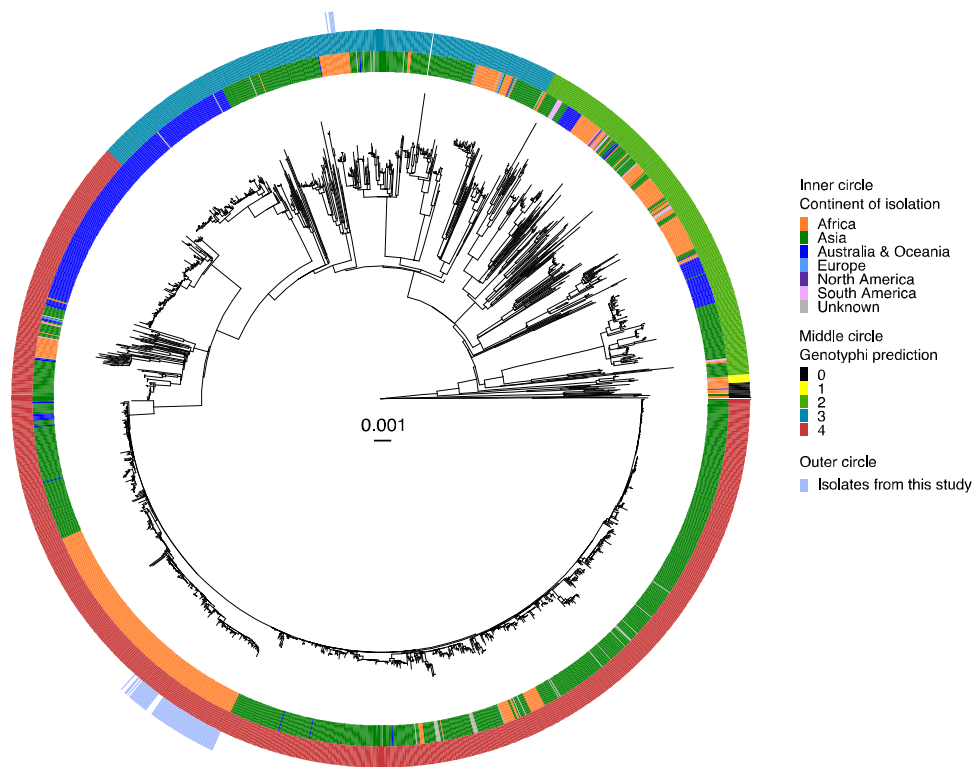

403

404 **Figure 5. Phylogenetic relationship of 95 *S. Typhi* strains isolates from Zimbabwe in the**  
405 **context of 1904 *S. Typhi* strains isolated from globally dispersed locations.** Maximum  
406 likelihood phylogenetic tree constructed based on variation in shared nucleotide sequence  
407 with reference to *S Typhi* CT18 whole genome sequence assembly (24). Continent of  
408 isolation (inner circle), genotype based on TyphiNET designation (middle circle) and isolates  
409 reported in this study (outer circle) are color coded as indicated in the key (inset).

---

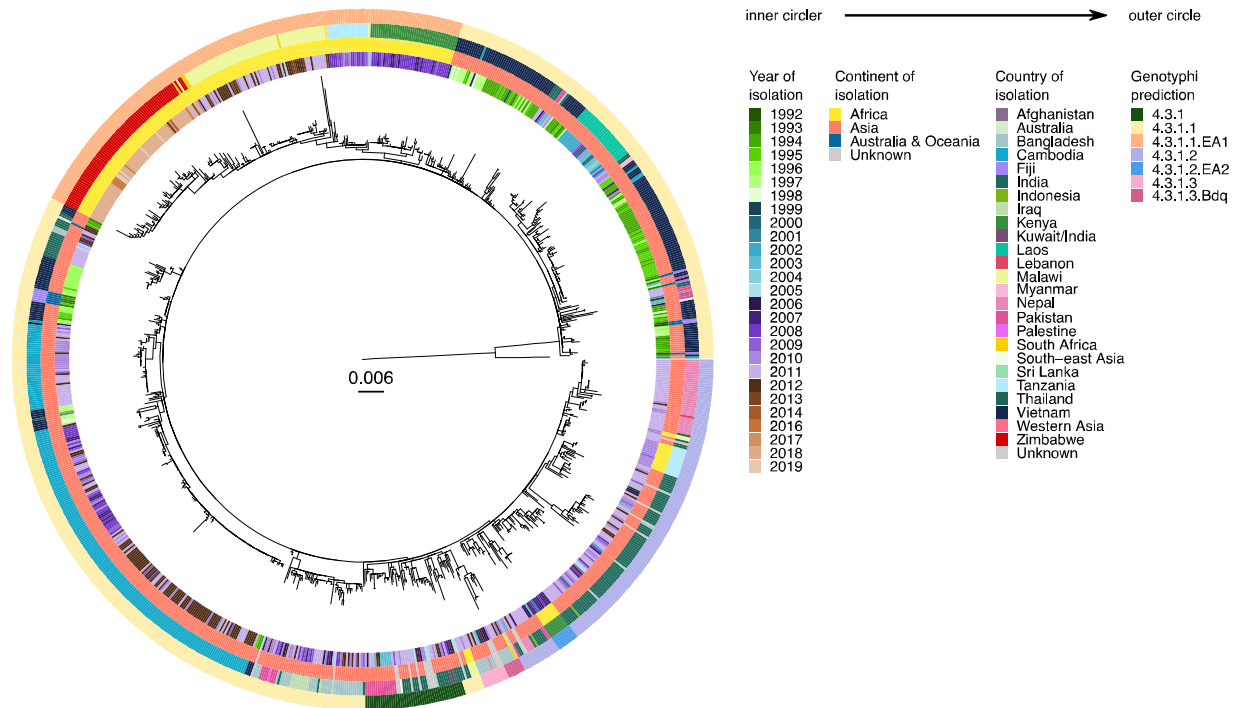

410

411 **Figure 6. Phylogenetic relationship of genotype 4.3.1 *S. Typhi* strains isolates from**  
412 **Zimbabwe and globally dispersed locations.** Maximum likelihood phylogenetic tree  
413 constructed based on variation in shared nucleotide sequence with reference to *S. Typhi* CT18  
414 whole genome sequence assembly (24). Year of isolation, continent of isolation, country of  
415 isolation and genotype based on TyphiNET designation are indicated in concentric circles  
416 color coded as indicated in the key (inset).

---

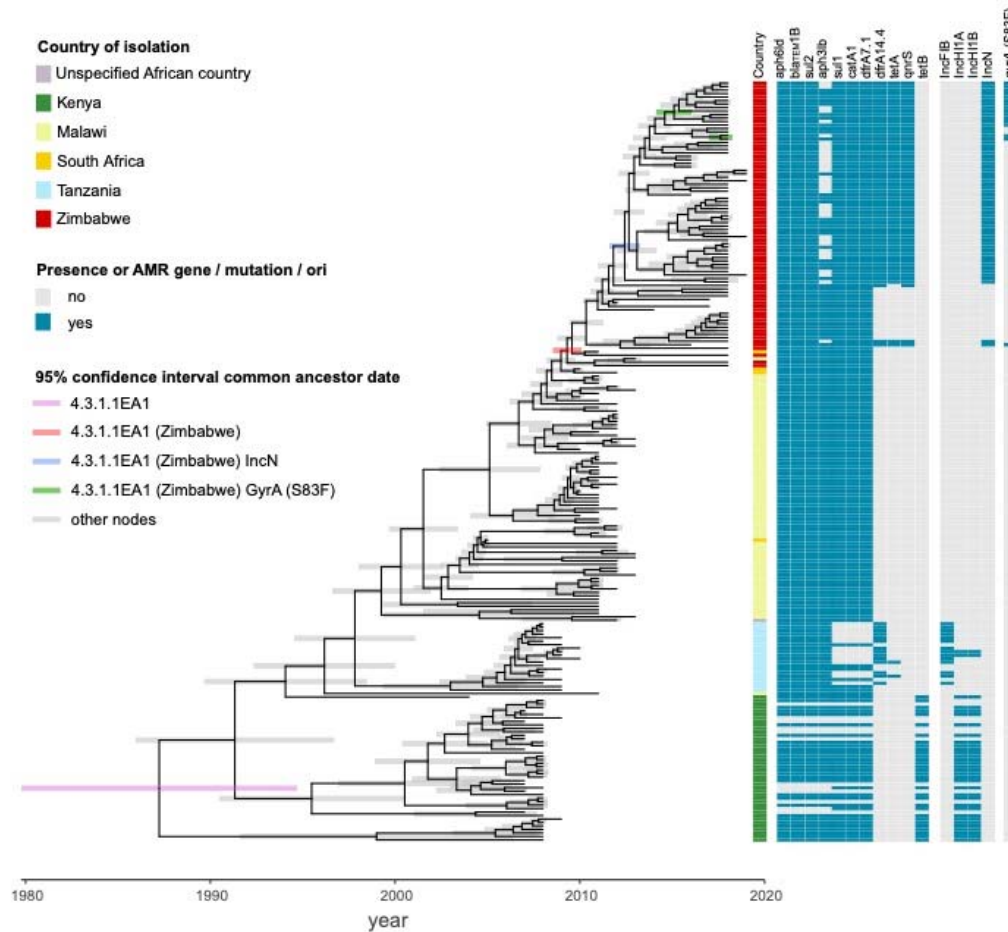

417

418 **Figure 7. Time-scaled phylogenetic tree of genotype 4.3.1.1EA1 *S. Typhi* isolates.**

419 Terminal branch lengths are constrained to date of isolation and the 95% credibility interval

420 is indicated by shaded bar color-coded to identify nodes corresponding to the common

421 ancestor of the 4.3.1.1EA1 clade, 4.3.1.1EA1 isolated from Zimbabwe, 4.3.1.1EA1 from

422 Zimbabwe carrying an IncN plasmid and 4.3.1.1EA1 from Zimbabwe with mutations in the

423 QRDR of *gyrA* as indicated in the key (inset). Country of isolation and presence absence of

424 AMR and replicon are indicated in the key (inset).

425

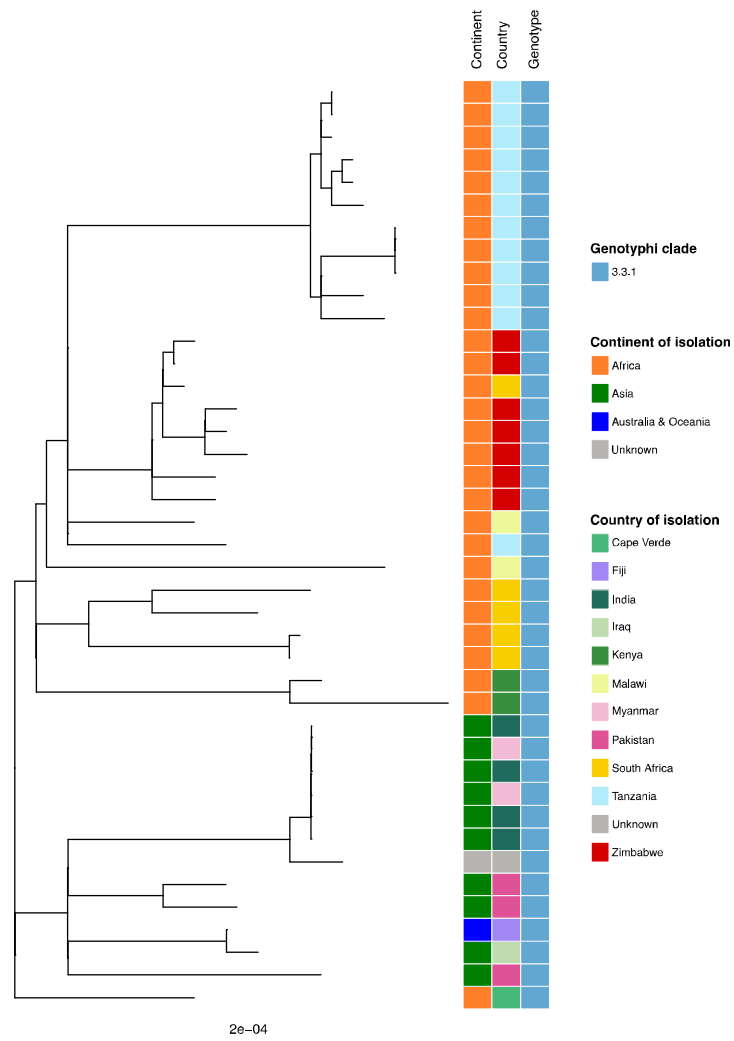

426

427 **Supplemental Figure 1.** Phylogeny of the subclade 3.3.1 extracted from the global tree.

428 Continent and Country of isolation are represented on a colour coded on as indicated on the

429 key

---

Rate=1.43e+00,MRCA=2002.39,R2=0.75,p<1.00e-04

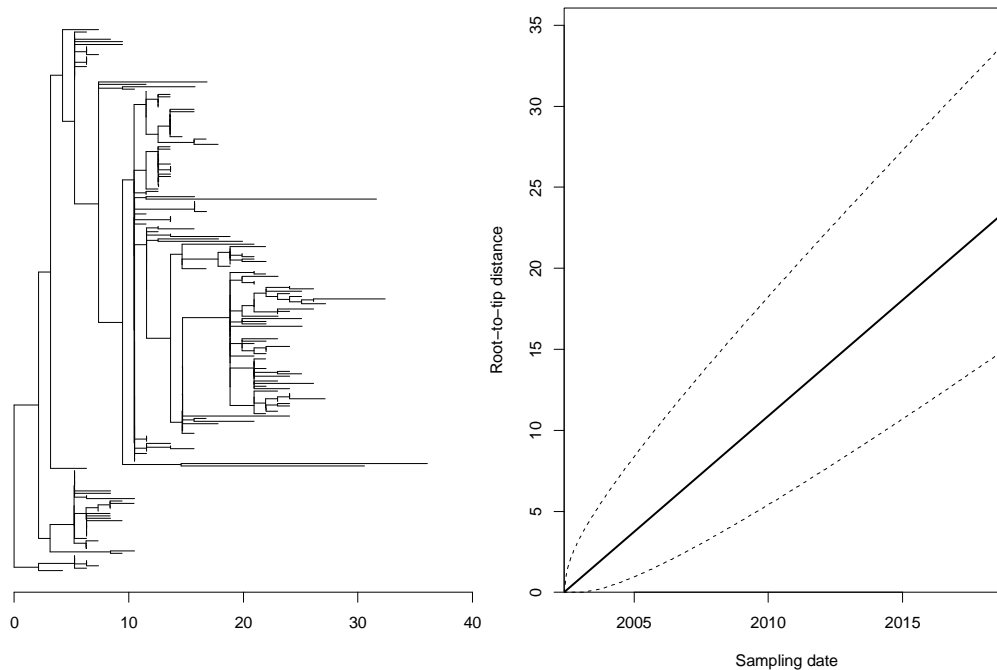

430

431 **Supplemental Figure 2.** Root to tip regression analysis indicating temporal signal for the  
432 accumulation of SNPs within the 4.3.1.1EA1 clade.

433

434

---

## References

- 435 1. James SL, Abate D, Abate KH, Abay SM, Abbafati C, Abbasi N, et al. Global,  
436 regional, and national incidence, prevalence, and years lived with disability for 354 diseases  
437 and injuries for 195 countries and territories, 1990&#x2013;2017: a systematic analysis for  
438 the Global Burden of Disease Study 2017. *The Lancet*. 2018;392(10159):1789-858.
- 439 2. Roth GA, Abate D, Abate KH, Abay SM, Abbafati C, Abbasi N, et al. Global,  
440 regional, and national age-sex-specific mortality for 282 causes of death in 195 countries and  
441 territories, 1980&#x2013;2017: a systematic analysis for the Global Burden of Disease Study  
442 2017. *The Lancet*. 2018;392(10159):1736-88.
- 443 3. Antillón M, Warren JL, Crawford FW, Weinberger DM, Kürüm E, Pak GD, et al. The  
444 burden of typhoid fever in low-and middle-income countries: a meta-regression approach.  
445 *PLoS neglected tropical diseases*. 2017;11(2):e0005376.
- 446 4. Mogasale V, Maskery B, Ochiai RL, Lee JS, Mogasale VV, Ramani E, et al. Burden  
447 of typhoid fever in low-income and middle-income countries: a systematic, literature-based  
448 update with risk-factor adjustment. *The Lancet Global health*. 2014;2(10):e570-e80.

- 449 5. Stanaway JD, Reiner RC, Blacker BF, Goldberg EM, Khalil IA, Troeger CE, et al.  
450 The global burden of typhoid and paratyphoid fevers: a systematic analysis for the Global  
451 Burden of Disease Study 2017. *The Lancet Infectious Diseases*. 2019;19(4):369-81.
- 452 6. Andrews JR, Qamar FN, Charles RC, Ryan ET. Extensively drug-resistant typhoid—  
453 are conjugate vaccines arriving just in time? *New England Journal of Medicine*.  
454 2018;379(16):1493-5.
- 455 7. Marchello CS, Hong CY, Crump JA. Global Typhoid Fever Incidence: A Systematic  
456 Review and Meta-analysis. *Clinical Infectious Diseases*. 2019;68(Supplement\_2):S105-S16.
- 457 8. Klemm EJ, Shakoor S, Page AJ, Qamar FN, Judge K, Saeed DK, et al. Emergence of  
458 an extensively drug-resistant *Salmonella enterica* serovar Typhi clone harboring a  
459 promiscuous plasmid encoding resistance to fluoroquinolones and third-generation  
460 cephalosporins. *MBio*. 2018;9(1):e00105-18.
- 461 9. Vekemans J, Hasso-Agopsowicz M, Kang G, Hausdorff WP, Fiore A, Tayler E, et al.  
462 Leveraging Vaccines to Reduce Antibiotic Use and Prevent Antimicrobial Resistance: A  
463 World Health Organization Action Framework. *Clin Infect Dis*. 2021;73(4):e1011-e7.
- 464 10. N'Cho H S, Masunda KPE, Mukeredzi I, Manangazira P, Govore E, Duri C, et al.  
465 Notes from the Field: Typhoid Fever Outbreak - Harare, Zimbabwe, October 2017-February  
466 2018. *MMWR Morb Mortal Wkly Rep*. 2019;68(2):44-5.
- 467 11. Lightowler MS, Manangazira P, Nackers F, Van Herp M, Phiri I, Kuwenyi K, et al.  
468 Effectiveness of typhoid conjugate vaccine in Zimbabwe used in response to an outbreak  
469 among children and young adults: A matched case control study. *Vaccine*. 2022;40(31):4199-  
470 210.
- 471 12. Mashe T, Leekitcharoenphon P, Mtapuri-Zinyowera S, Kingsley RA, Robertson V,  
472 Tarupiwa A, et al. *Salmonella enterica* serovar Typhi H58 clone has been endemic in  
473 Zimbabwe from 2012 to 2019. *Journal of Antimicrobial Chemotherapy*. 2020.
- 474 13. Mashe T, Leekitcharoenphon P, Mtapuri-Zinyowera S, Kingsley RA, Robertson V,  
475 Tarupiwa A, et al. *Salmonella enterica* serovar Typhi H58 clone has been endemic in  
476 Zimbabwe from 2012 to 2019. *J Antimicrob Chemother*. 2021;76(5):1160-7.
- 477 14. Yap K-P, Ho WS, Gan HM, Chai LC, Thong KL. Global MLST of *Salmonella* Typhi  
478 Revisited in Post-genomic Era: Genetic Conservation, Population Structure, and Comparative  
479 Genomics of Rare Sequence Types. *Frontiers in Microbiology*. 2016;7(270).
- 480 15. Ingle DJ, Nair S, Hartman H, Ashton PM, Dyson ZA, Day M, et al. Informal genomic  
481 surveillance of regional distribution of *Salmonella* Typhi genotypes and antimicrobial  
482 resistance via returning travellers. *PLoS neglected tropical diseases*. 2019;13(9):e0007620.
- 483 16. Afema JA, Byarugaba DK, Shah DH, Atukwase E, Nambi M, Sicho WM. Potential  
484 sources and transmission of *Salmonella* and antimicrobial resistance in Kampala, Uganda.  
485 *PLoS One*. 2016;11(3):e0152130.
- 486 17. Holt KE, Parkhill J, Mazzoni CJ, Roumagnac P, Weill FX, Goodhead I, et al. High-  
487 throughput sequencing provides insights into genome variation and evolution in *Salmonella*  
488 Typhi. *Nat Genet*. 2008;40(8):987-93.
- 489 18. Hudzicki J. Kirby-Bauer disk diffusion susceptibility test protocol. 2009.
- 490 19. Wayne P. Clinical and Laboratory Standards Institute (CLSI); 2010. Performance  
491 standards for antimicrobial susceptibility testing. 2010;20.
- 492 20. Kirkwood M, Vohra P, Bawn M, Thilliez G, Pye H, Tanner J, et al. Ecological niche  
493 adaptation of *Salmonella* Typhimurium U288 is associated with altered pathogenicity and  
494 reduced zoonotic potential. *Commun Biol*. 2021;4(1):498.
- 495 21. Chen S, Zhou Y, Chen Y, Gu J. fastp: an ultra-fast all-in-one FASTQ preprocessor.  
496 *Bioinformatics*. 2018;34(17):i884-i90.



- 497 22. Ewels P, Magnusson M, Lundin S, Källér M. MultiQC: summarize analysis results  
498 for multiple tools and samples in a single report. *Bioinformatics*. 2016;32(19):3047-8.
- 499 23. Lu J, Breitwieser FP, Thielen P, Salzberg SL. Bracken: estimating species abundance  
500 in metagenomics data. *PeerJ Computer Science*. 2017;3:e104.
- 501 24. Parkhill J, Dougan G, James K, Thomson N, Pickard D, Wain J, et al. Complete  
502 genome sequence of a multiple drug resistant *Salmonella enterica* serovar Typhi CT18.  
503 *Nature*. 2001;413(6858):848.
- 504 25. Branchu P, Charity OJ, Bawn M, Thilliez G, Dallman TJ, Petrovska L, et al. SGI-4 in  
505 Monophasic *Salmonella Typhimurium* ST34 Is a Novel ICE That Enhances Resistance to  
506 Copper. *Frontiers in microbiology*. 2019; 10:[1118 p.].
- 507 26. Stamatakis A. RAxML-VI-HPC: maximum likelihood-based phylogenetic analyses  
508 with thousands of taxa and mixed models. *Bioinformatics*. 2006;22(21):2688-90.
- 509 27. Yu G, Smith DK, Zhu H, Guan Y, Lam TT-Y, McInerney G. ggtree: anrpackage for  
510 visualization and annotation of phylogenetic trees with their covariates and other associated  
511 data. *Methods in Ecology and Evolution*. 2017;8(1):28-36.
- 512 28. Didelot X, Croucher NJ, Bentley SD, Harris SR, Wilson DJ. Bayesian inference of  
513 ancestral dates on bacterial phylogenetic trees. *Nucleic acids research*. 2018;46(22):e134-e.
- 514 29. Hunt M, Mather AE, Sánchez-Busó L, Page AJ, Parkhill J, Keane JA, et al. ARIBA:  
515 rapid antimicrobial resistance genotyping directly from sequencing reads. *Microbial  
516 genomics*. 2017;3(10):e000131-e.
- 517 30. Carattoli A, Zankari E, García-Fernández A, Larsen MV, Lund O, Villa L, et al. *In  
518 Silico* Detection and Typing of Plasmids using PlasmidFinder and Plasmid Multilocus  
519 Sequence Typing. *Antimicrobial Agents and Chemotherapy*. 2014;58(7):3895-903.
- 520 31. Zankari E, Hasman H, Cosentino S, Vestergaard M, Rasmussen S, Lund O, et al.  
521 Identification of acquired antimicrobial resistance genes. *Journal of antimicrobial  
522 chemotherapy*. 2012;67(11):2640-4.
- 523 32. Bankevich A, Nurk S, Antipov D, Gurevich AA, Dvorkin M, Kulikov AS, et al.  
524 SPAdes: a new genome assembly algorithm and its applications to single-cell sequencing.  
525 *Journal of computational biology*. 2012;19(5):455-77.
- 526 33. Gurevich A, Saveliev V, Vyahhi N, Tesler G. QUAST: quality assessment tool for  
527 genome assemblies. *Bioinformatics*. 2013;29(8):1072-5.
- 528 34. Wick RR, Schultz MB, Zobel J, Holt KE. Bandage: interactive visualization of de  
529 novo genome assemblies. *Bioinformatics*. 2015;31(20):3350-2.
- 530 35. Seemann T. Prokka: rapid prokaryotic genome annotation. *Bioinformatics*.  
531 2014;30(14):2068-9.
- 532 36. Page AJ, Cummins CA, Hunt M, Wong VK, Reuter S, Holden MTG, et al. Roary:  
533 rapid large-scale prokaryote pan genome analysis. *Bioinformatics*. 2015;31(22):3691-3.
- 534 37. Camacho C, Coulouris G, Avagyan V, Ma N, Papadopoulos J, Bealer K, et al.  
535 BLAST+: architecture and applications. *BMC Bioinformatics*. 2009;10:421.
- 536 38. Guy L, Kultima JR, Andersson SG. genoPlotR: comparative gene and genome  
537 visualization in R. *Bioinformatics*. 2010;26(18):2334-5.
- 538 39. Turner AK, Nair S, Wain J. The acquisition of full fluoroquinolone resistance in  
539 *Salmonella Typhi* by accumulation of point mutations in the topoisomerase targets. *Journal of  
540 Antimicrobial Chemotherapy*. 2006;58(4):733-40.
- 541 40. Chiou CS, Lauderdale TL, Phung DC, Watanabe H, Kuo JC, Wang PJ, et al.  
542 Antimicrobial resistance in *Salmonella enterica* Serovar Typhi isolates from Bangladesh,  
543 Indonesia, Taiwan, and Vietnam. *Antimicrob Agents Chemother*. 2014;58(11):6501-7.

- 544 41. Hendriksen RS, Leekitcharoenphon P, Lukjancenko O, Lukwesa-Musyani C,  
545 Tambatamba B, Mwaba J, et al. Genomic signature of multidrug-resistant *Salmonella*  
546 *enterica* serovar typhi isolates related to a massive outbreak in Zambia between 2010 and  
547 2012. *J Clin Microbiol*. 2015;53(1):262-72.
- 548 42. Sofia HJ, Chen G, Hetzler BG, Reyes-Spindola JF, Miller NE. Radical SAM, a novel  
549 protein superfamily linking unresolved steps in familiar biosynthetic pathways with radical  
550 mechanisms: functional characterization using new analysis and information visualization  
551 methods. *Nucleic Acids Res*. 2001;29(5):1097-106.
- 552 43. Wong VK, Baker S, Pickard DJ, Parkhill J, Page AJ, Feasey NA, et al.  
553 Phylogeographical analysis of the dominant multidrug-resistant H58 clade of *Salmonella*  
554 *Typhi* identifies inter- and intracontinental transmission events. *Nature genetics*.  
555 2015;47(6):632.
- 556 44. Wong VK, Baker S, Pickard DJ, Parkhill J, Page AJ, Feasey NA, et al.  
557 Phylogeographical analysis of the dominant multidrug-resistant H58 clade of *Salmonella*  
558 *Typhi* identifies inter- and intracontinental transmission events. *Nat Genet*. 2015;47(6):632-9.
- 559 45. Polonsky JA, Martinez-Pino I, Nackers F, Chonzi P, Manangazira P, Van Herp M, et  
560 al. Descriptive epidemiology of typhoid fever during an epidemic in Harare, Zimbabwe,  
561 2012. *PLoS One*. 2014;9(12):e114702.
- 562 46. Klemm EJ, Shakoor S, Page AJ, Qamar FN, Judge K, Saeed DK, et al. Emergence of  
563 an Extensively Drug-Resistant *Salmonella enterica* Serovar Typhi Clone Harboring a  
564 Promiscuous Plasmid Encoding Resistance to Fluoroquinolones and Third-Generation  
565 Cephalosporins. *mBio*. 2018;9(1).
- 566 47. Kariuki S, Dyson ZA, Mbae C, Ngetich R, Kawai SM, Wairimu C, et al. Multiple  
567 introductions of multidrug-resistant typhoid associated with acute infection and  
568 asymptomatic carriage, Kenya. *Elife*. 2021;10.
- 569 48. da Silva KE, Tanmoy AM, Pragasam AK, Iqbal J, Sajib MSI, Mutreja A, et al. The  
570 international and intercontinental spread and expansion of antimicrobial-resistant *Salmonella*  
571 *Typhi*: a genomic epidemiology study. *Lancet Microbe*. 2022.
- 572 49. Argimon S, Yeats CA, Goater RJ, Abudahab K, Taylor B, Underwood A, et al. A  
573 global resource for genomic predictions of antimicrobial resistance and surveillance of  
574 *Salmonella Typhi* at pathogenwatch. *Nat Commun*. 2021;12(1):2879.
- 575 50. Dyson ZA, Klemm EJ, Palmer S, Dougan G. Antibiotic Resistance and Typhoid. *Clin*  
576 *Infect Dis*. 2019;68(Suppl 2):S165-S70.
- 577 51. Holt KE, Thomson NR, Wain J, Phan MD, Nair S, Hasan R, et al. Multidrug-resistant  
578 *Salmonella enterica* serovar paratyphi A harbors IncHI1 plasmids similar to those found in  
579 serovar typhi. *J Bacteriol*. 2007;189(11):4257-64.
- 580 52. Dyson ZA, Thanh DP, Bodhidatta L, Mason CJ, Srijan A, Rabaa MA, et al. Whole  
581 Genome Sequence Analysis of *Salmonella Typhi* Isolated in Thailand before and after the  
582 Introduction of a National Immunization Program. *PLOS Neglected Tropical Diseases*.  
583 2017;11(1):e0005274.

584
